# Supplementary material
Source: MDPI journal article supplement (https://www.mdpi.com/2072-4292/14/10/2442)
Supplement: s1 [file s1]

**Supplementary Table S1.** Shapiro–Wilk (1), Pearson's chi-squared (2), Lilliefors (3), Cramér–von Mises (4) norm tests of invasive and weed species.

| Test    | 1                              | 2    | 3    | 4    | 1                        | 2    | 3    | 4    | 1                            | 2    | 3    | 4    | 1                         | 2    | 3    | 4    | 1                     | 2    | 3    | 4    |
|---------|--------------------------------|------|------|------|--------------------------|------|------|------|------------------------------|------|------|------|---------------------------|------|------|------|-----------------------|------|------|------|
| VI      | <i>Ambrosia artemisiifolia</i> |      |      |      | <i>Atriplex tatarica</i> |      |      |      | <i>Euphorbia seguieriana</i> |      |      |      | <i>Glycyrrhiza glabra</i> |      |      |      | <i>Setaria pumila</i> |      |      |      |
| Boochs  | 0.21                           | 0.36 | 0.16 | 0.14 | 0.49                     | 0.57 | 0.36 | 0.41 | 0.49                         | 0.36 | 0.24 | 0.35 | 0.66                      | 0.36 | 0.80 | 0.63 | 0.49                  | 0.36 | 0.72 | 0.80 |
| Boochs2 | 0.44                           | 0.57 | 0.53 | 0.46 | 1.00                     | 0.85 | 1.00 | 1.00 | 0.44                         | 0.36 | 0.12 | 0.18 | 0.34                      | 0.36 | 0.22 | 0.20 | 0.86                  | 0.57 | 0.48 | 0.66 |
| CARI    | 0.88                           | 0.57 | 0.84 | 0.83 | 0.25                     | 0.22 | 0.32 | 0.28 | 0.05                         | 0.03 | 0.16 | 0.09 | 0.30                      | 0.85 | 0.28 | 0.52 | 0.15                  | 0.36 | 0.02 | 0.04 |
| Carter2 | 0.03                           | 0.22 | 0.10 | 0.08 | 0.98                     | 0.85 | 0.98 | 0.94 | 0.78                         | 0.36 | 0.97 | 0.88 | 0.27                      | 0.03 | 0.16 | 0.09 | 0.83                  | 0.57 | 0.91 | 0.77 |
| Carter3 | 0.28                           | 0.57 | 0.48 | 0.49 | 0.91                     | 0.57 | 0.43 | 0.60 | 0.45                         | 0.57 | 0.24 | 0.35 | 0.21                      | 0.03 | 0.03 | 0.03 | 0.39                  | 0.36 | 0.52 | 0.35 |
| Carter4 | 0.05                           | 0.22 | 0.08 | 0.11 | 0.76                     | 0.36 | 0.47 | 0.49 | 0.78                         | 0.85 | 0.95 | 0.89 | 0.97                      | 0.85 | 0.91 | 0.87 | 0.75                  | 0.85 | 0.83 | 0.86 |
| Carter5 | 0.84                           | 0.13 | 0.44 | 0.63 | 0.84                     | 0.36 | 0.86 | 0.83 | 0.99                         | 0.85 | 0.92 | 0.92 | 0.02                      | 0.36 | 0.05 | 0.04 | 0.02                  | 0.13 | 0.02 | 0.02 |
| Carter6 | 0.99                           | 0.85 | 0.97 | 0.98 | 0.49                     | 0.13 | 0.72 | 0.51 | 0.03                         | 0.13 | 0.02 | 0.02 | 0.19                      | 0.22 | 0.31 | 0.34 | 0.70                  | 0.85 | 0.84 | 0.67 |
| CI      | 0.92                           | 0.85 | 0.89 | 0.82 | 0.04                     | 0.01 | 0.02 | 0.03 | 0.82                         | 0.36 | 0.70 | 0.54 | 0.25                      | 0.57 | 0.49 | 0.32 | 0.88                  | 0.85 | 0.93 | 0.94 |
| CI2     | 0.15                           | 0.57 | 0.26 | 0.25 | 0.98                     | 0.57 | 0.83 | 0.88 | 0.79                         | 0.85 | 0.96 | 0.94 | 0.83                      | 0.22 | 0.49 | 0.39 | 0.96                  | 0.85 | 0.99 | 0.99 |
| CIInt   | 0.34                           | 0.03 | 0.12 | 0.24 | 0.53                     | 0.57 | 0.63 | 0.56 | 0.72                         | 0.57 | 0.68 | 0.67 | 0.25                      | 0.36 | 0.52 | 0.43 | 0.15                  | 0.22 | 0.01 | 0.05 |
| CRI1    | 0.83                           | 0.57 | 0.69 | 0.58 | 0.77                     | 0.85 | 0.91 | 0.86 | 0.12                         | 0.02 | 0.01 | 0.05 | 0.07                      | 0.22 | 0.05 | 0.06 | 0.70                  | 0.13 | 0.11 | 0.31 |
| CRI2    | 0.46                           | 0.22 | 0.10 | 0.28 | 0.18                     | 0.01 | 0.04 | 0.07 | 0.21                         | 0.57 | 0.25 | 0.35 | 0.24                      | 0.05 | 0.15 | 0.21 | 0.52                  | 0.57 | 0.57 | 0.50 |
| CRI3    | 0.88                           | 0.57 | 0.78 | 0.81 | 0.31                     | 0.57 | 0.48 | 0.50 | 0.75                         | 0.57 | 0.82 | 0.74 | 0.19                      | 0.36 | 0.08 | 0.09 | 0.48                  | 0.57 | 0.41 | 0.36 |
| CRI4    | 0.17                           | 0.57 | 0.14 | 0.16 | 0.99                     | 0.57 | 0.76 | 0.90 | 0.72                         | 0.85 | 0.95 | 0.90 | 0.76                      | 0.22 | 0.43 | 0.29 | 0.82                  | 0.85 | 0.96 | 0.97 |
| D1      | 0.02                           | 0.02 | 0.14 | 0.02 | 0.96                     | 0.57 | 0.83 | 0.89 | 0.24                         | 0.13 | 0.13 | 0.15 | 0.06                      | 0.36 | 0.21 | 0.18 | 0.25                  | 0.08 | 0.09 | 0.07 |
| D2      | 0.97                           | 0.36 | 0.84 | 0.89 | 0.31                     | 0.22 | 0.60 | 0.43 | 0.44                         | 0.85 | 0.50 | 0.37 | 0.47                      | 0.57 | 0.25 | 0.43 | 0.02                  | 0.02 | 0.03 | 0.01 |
| Datt    | 0.09                           | 0.13 | 0.13 | 0.08 | 0.98                     | 0.57 | 0.93 | 0.94 | 0.97                         | 0.36 | 0.90 | 0.88 | 0.03                      | 0.08 | 0.05 | 0.04 | 0.11                  | 0.13 | 0.14 | 0.09 |
| Datt2   | 0.14                           | 0.13 | 0.07 | 0.13 | 0.61                     | 0.36 | 0.69 | 0.74 | 0.79                         | 0.85 | 0.97 | 0.95 | 0.66                      | 0.13 | 0.19 | 0.41 | 0.81                  | 0.36 | 0.77 | 0.80 |
| Datt3   | 0.12                           | 0.85 | 0.09 | 0.09 | 0.37                     | 0.36 | 0.42 | 0.37 | 0.08                         | 0.13 | 0.06 | 0.07 | 0.05                      | 0.08 | 0.03 | 0.11 | 0.58                  | 0.13 | 0.15 | 0.43 |
| Datt4   | 0.62                           | 0.36 | 0.48 | 0.43 | 0.54                     | 0.08 | 0.41 | 0.25 | 0.49                         | 0.85 | 0.90 | 0.73 | 0.58                      | 0.57 | 0.87 | 0.74 | 0.51                  | 0.85 | 0.66 | 0.62 |
| Datt5   | 0.35                           | 0.13 | 0.15 | 0.27 | 0.53                     | 0.85 | 0.92 | 0.86 | 0.81                         | 0.36 | 0.57 | 0.72 | 0.52                      | 0.36 | 0.42 | 0.46 | 0.60                  | 0.22 | 0.61 | 0.72 |
| Datt6   | 0.95                           | 0.57 | 0.55 | 0.63 | 0.86                     | 0.36 | 0.85 | 0.85 | 0.08                         | 0.05 | 0.08 | 0.12 | 0.52                      | 0.36 | 0.64 | 0.54 | 0.68                  | 0.57 | 0.33 | 0.27 |
| DD      | 0.66                           | 0.57 | 0.31 | 0.65 | 0.34                     | 0.36 | 0.51 | 0.31 | 0.95                         | 0.57 | 0.88 | 0.90 | 0.15                      | 0.36 | 0.16 | 0.15 | 0.78                  | 0.13 | 0.28 | 0.50 |
| DDn     | 0.92                           | 0.85 | 0.84 | 0.82 | 0.68                     | 0.13 | 0.23 | 0.38 | 0.83                         | 0.36 | 0.70 | 0.66 | 0.03                      | 0.22 | 0.13 | 0.06 | 0.19                  | 0.57 | 0.42 | 0.36 |
| DPI     | 0.45                           | 0.22 | 0.26 | 0.18 | 1.00                     | 0.57 | 1.00 | 1.00 | 0.10                         | 0.22 | 0.16 | 0.15 | 0.20                      | 0.08 | 0.04 | 0.11 | 0.25                  | 0.13 | 0.46 | 0.22 |
| DWSI4   | 0.80                           | 0.57 | 0.76 | 0.70 | 0.51                     | 0.85 | 0.88 | 0.84 | 0.89                         | 0.36 | 0.86 | 0.80 | 0.33                      | 0.36 | 0.16 | 0.40 | 0.92                  | 0.85 | 0.90 | 0.89 |

|            |      |      |      |      |      |      |      |      |      |      |      |      |      |      |      |      |      |      |      |      |
|------------|------|------|------|------|------|------|------|------|------|------|------|------|------|------|------|------|------|------|------|------|
| EGFN       | 0.93 | 0.85 | 0.92 | 0.89 | 0.92 | 0.57 | 0.91 | 0.83 | 0.32 | 0.57 | 0.36 | 0.46 | 0.27 | 0.57 | 0.48 | 0.42 | 0.11 | 0.22 | 0.27 | 0.10 |
| EGFR       | 0.71 | 0.57 | 0.81 | 0.76 | 0.82 | 0.57 | 0.75 | 0.80 | 0.35 | 0.57 | 0.41 | 0.47 | 0.23 | 0.57 | 0.47 | 0.39 | 0.02 | 0.22 | 0.05 | 0.01 |
| EVI        | 0.81 | 0.85 | 0.72 | 0.73 | 0.56 | 0.57 | 0.56 | 0.47 | 0.46 | 0.22 | 0.62 | 0.38 | 0.00 | 0.00 | 0.00 | 0.00 | 0.95 | 0.57 | 0.95 | 0.84 |
| GI         | 0.75 | 0.57 | 0.55 | 0.63 | 0.52 | 0.85 | 0.93 | 0.89 | 0.96 | 0.36 | 0.78 | 0.88 | 0.15 | 0.36 | 0.14 | 0.25 | 0.82 | 0.36 | 0.82 | 0.86 |
| Gitelson   | 0.88 | 0.57 | 0.64 | 0.63 | 0.71 | 0.57 | 0.61 | 0.61 | 0.48 | 0.13 | 0.34 | 0.39 | 0.15 | 0.22 | 0.23 | 0.23 | 0.87 | 0.57 | 0.48 | 0.53 |
| Gitelson2  | 0.49 | 0.57 | 0.59 | 0.51 | 0.68 | 0.85 | 0.93 | 0.81 | 0.89 | 0.57 | 0.72 | 0.85 | 0.68 | 0.03 | 0.24 | 0.31 | 0.94 | 0.36 | 0.85 | 0.80 |
| GMI1       | 0.91 | 0.85 | 0.85 | 0.82 | 0.25 | 0.57 | 0.64 | 0.46 | 0.75 | 0.57 | 0.84 | 0.76 | 0.18 | 0.36 | 0.10 | 0.11 | 0.51 | 0.36 | 0.50 | 0.38 |
| GMI2       | 0.10 | 0.57 | 0.14 | 0.15 | 0.96 | 0.57 | 0.88 | 0.81 | 0.75 | 0.85 | 0.96 | 0.92 | 0.86 | 0.22 | 0.55 | 0.46 | 0.95 | 0.85 | 0.96 | 0.98 |
| Green_NDVI | 0.61 | 0.85 | 0.68 | 0.63 | 0.30 | 0.85 | 0.79 | 0.62 | 0.56 | 0.57 | 0.76 | 0.61 | 0.45 | 0.36 | 0.17 | 0.25 | 0.24 | 0.36 | 0.31 | 0.23 |
| Maccioni   | 0.84 | 0.22 | 0.74 | 0.59 | 0.27 | 0.36 | 0.59 | 0.36 | 0.93 | 0.36 | 0.85 | 0.86 | 0.07 | 0.22 | 0.21 | 0.09 | 0.14 | 0.13 | 0.05 | 0.15 |
| MCARI      | 0.90 | 0.36 | 0.40 | 0.63 | 0.31 | 0.36 | 0.43 | 0.44 | 0.85 | 0.85 | 0.99 | 0.95 | 0.01 | 0.01 | 0.01 | 0.04 | 0.29 | 0.85 | 0.69 | 0.44 |
| MCARI2     | 0.47 | 0.57 | 0.27 | 0.25 | 0.78 | 0.85 | 0.85 | 0.87 | 0.55 | 0.36 | 0.57 | 0.44 | 0.90 | 0.13 | 0.38 | 0.56 | 0.88 | 0.85 | 0.80 | 0.86 |
| MPRI       | 0.92 | 0.85 | 0.51 | 0.70 | 0.31 | 0.36 | 0.37 | 0.26 | 0.17 | 0.57 | 0.15 | 0.24 | 0.73 | 0.22 | 0.73 | 0.85 | 0.72 | 0.57 | 0.35 | 0.54 |
| MSAVI      | 0.02 | 0.13 | 0.01 | 0.03 | 0.97 | 0.57 | 0.93 | 0.88 | 0.41 | 0.57 | 0.10 | 0.19 | 0.32 | 0.36 | 0.04 | 0.08 | 0.46 | 0.57 | 0.38 | 0.36 |
| mSR2       | 0.07 | 0.13 | 0.11 | 0.10 | 0.91 | 0.22 | 0.62 | 0.69 | 0.74 | 0.85 | 0.97 | 0.89 | 0.99 | 0.85 | 0.89 | 0.89 | 0.92 | 0.85 | 0.99 | 0.98 |
| MTCI       | 0.62 | 0.57 | 0.61 | 0.52 | 0.43 | 0.36 | 0.80 | 0.42 | 0.99 | 0.36 | 0.93 | 0.94 | 0.06 | 0.22 | 0.14 | 0.06 | 0.79 | 0.57 | 0.79 | 0.77 |
| MTVI       | 0.10 | 0.22 | 0.19 | 0.12 | 0.94 | 0.36 | 0.58 | 0.68 | 0.87 | 0.85 | 0.79 | 0.81 | 0.91 | 0.22 | 0.80 | 0.83 | 0.48 | 0.36 | 0.53 | 0.60 |
| NDVI       | 0.02 | 0.05 | 0.04 | 0.04 | 0.97 | 0.57 | 0.82 | 0.87 | 0.56 | 0.08 | 0.25 | 0.27 | 0.18 | 0.22 | 0.01 | 0.03 | 0.82 | 0.57 | 0.60 | 0.70 |
| NDVI2      | 0.04 | 0.13 | 0.07 | 0.06 | 0.92 | 0.22 | 0.74 | 0.76 | 0.72 | 0.85 | 0.96 | 0.88 | 0.98 | 0.36 | 0.85 | 0.87 | 0.86 | 0.85 | 0.98 | 0.92 |
| NDVI3      | 0.59 | 0.57 | 0.75 | 0.58 | 0.39 | 0.85 | 0.72 | 0.74 | 0.82 | 0.36 | 0.82 | 0.77 | 0.64 | 0.57 | 0.27 | 0.61 | 0.96 | 0.57 | 0.95 | 0.90 |
| OSAVI      | 0.04 | 0.13 | 0.01 | 0.04 | 0.97 | 0.57 | 0.88 | 0.87 | 0.44 | 0.57 | 0.12 | 0.20 | 0.28 | 0.36 | 0.03 | 0.07 | 0.65 | 0.57 | 0.55 | 0.53 |
| OSAVI2     | 0.04 | 0.13 | 0.08 | 0.06 | 0.92 | 0.22 | 0.74 | 0.76 | 0.71 | 0.85 | 0.96 | 0.88 | 0.98 | 0.36 | 0.85 | 0.87 | 0.86 | 0.85 | 0.98 | 0.92 |
| PARS       | 0.69 | 0.36 | 0.35 | 0.47 | 0.18 | 0.57 | 0.31 | 0.31 | 0.67 | 0.57 | 0.33 | 0.45 | 0.05 | 0.00 | 0.01 | 0.01 | 0.11 | 0.22 | 0.08 | 0.07 |
| PRI        | 0.86 | 0.57 | 0.53 | 0.73 | 0.77 | 0.85 | 0.52 | 0.58 | 0.33 | 0.22 | 0.64 | 0.39 | 0.73 | 0.22 | 0.59 | 0.53 | 0.82 | 0.57 | 0.87 | 0.82 |
| PRI.CI2    | 0.84 | 0.36 | 0.59 | 0.71 | 0.12 | 0.36 | 0.10 | 0.07 | 0.53 | 0.22 | 0.80 | 0.64 | 0.78 | 0.22 | 0.36 | 0.51 | 0.71 | 0.57 | 0.48 | 0.69 |
| PRI_norm   | 0.27 | 0.57 | 0.19 | 0.20 | 0.70 | 0.36 | 0.49 | 0.71 | 0.16 | 0.22 | 0.47 | 0.21 | 0.57 | 0.85 | 0.94 | 0.77 | 0.24 | 0.36 | 0.35 | 0.25 |
| PSND       | 0.62 | 0.85 | 0.93 | 0.84 | 0.83 | 0.57 | 0.76 | 0.75 | 0.24 | 0.22 | 0.22 | 0.13 | 0.15 | 0.22 | 0.10 | 0.04 | 0.07 | 0.36 | 0.13 | 0.06 |
| PSRI       | 0.00 | 0.13 | 0.02 | 0.02 | 0.72 | 0.85 | 0.65 | 0.59 | 0.19 | 0.03 | 0.03 | 0.07 | 0.80 | 0.57 | 0.79 | 0.71 | 0.41 | 0.36 | 0.76 | 0.48 |
| PSSR       | 0.42 | 0.57 | 0.71 | 0.54 | 0.83 | 0.57 | 0.29 | 0.54 | 0.47 | 0.22 | 0.29 | 0.28 | 0.06 | 0.02 | 0.00 | 0.01 | 1.00 | 0.57 | 1.00 | 0.99 |
| RDVI       | 0.78 | 0.57 | 0.45 | 0.63 | 0.66 | 0.36 | 0.83 | 0.74 | 0.47 | 0.22 | 0.53 | 0.69 | 0.95 | 0.36 | 0.64 | 0.81 | 0.68 | 0.22 | 0.39 | 0.46 |
| REP_Li     | 0.69 | 0.57 | 0.82 | 0.61 | 0.31 | 0.22 | 0.49 | 0.29 | 0.88 | 0.36 | 0.89 | 0.83 | 0.08 | 0.08 | 0.13 | 0.07 | 0.05 | 0.13 | 0.05 | 0.09 |

|               |      |      |      |      |      |      |      |      |      |      |      |      |      |      |      |      |      |      |      |      |
|---------------|------|------|------|------|------|------|------|------|------|------|------|------|------|------|------|------|------|------|------|------|
| SAVI          | 0.03 | 0.13 | 0.01 | 0.04 | 0.97 | 0.57 | 0.89 | 0.88 | 0.47 | 0.57 | 0.13 | 0.23 | 0.28 | 0.36 | 0.03 | 0.07 | 0.66 | 0.57 | 0.53 | 0.53 |
| SPVI          | 0.84 | 0.36 | 0.44 | 0.55 | 0.86 | 0.22 | 0.74 | 0.63 | 0.92 | 0.85 | 0.85 | 0.90 | 0.87 | 0.36 | 0.85 | 0.90 | 0.46 | 0.36 | 0.54 | 0.55 |
| SR            | 0.07 | 0.13 | 0.08 | 0.14 | 0.90 | 0.57 | 0.53 | 0.69 | 0.66 | 0.22 | 0.44 | 0.39 | 0.06 | 0.02 | 0.00 | 0.01 | 0.99 | 0.85 | 0.96 | 0.97 |
| SR1           | 0.10 | 0.57 | 0.14 | 0.15 | 0.96 | 0.57 | 0.88 | 0.81 | 0.75 | 0.85 | 0.96 | 0.92 | 0.86 | 0.22 | 0.55 | 0.46 | 0.95 | 0.85 | 0.96 | 0.98 |
| SR2           | 0.12 | 0.57 | 0.28 | 0.27 | 0.87 | 0.57 | 0.33 | 0.56 | 0.93 | 0.36 | 0.68 | 0.83 | 0.30 | 0.03 | 0.11 | 0.07 | 0.93 | 0.22 | 0.76 | 0.92 |
| SR3           | 0.91 | 0.85 | 0.85 | 0.82 | 0.25 | 0.57 | 0.64 | 0.46 | 0.75 | 0.57 | 0.84 | 0.76 | 0.18 | 0.36 | 0.10 | 0.11 | 0.51 | 0.36 | 0.50 | 0.38 |
| SR4           | 0.67 | 0.13 | 0.53 | 0.39 | 0.89 | 0.36 | 0.90 | 0.85 | 0.86 | 0.36 | 0.63 | 0.68 | 0.02 | 0.36 | 0.04 | 0.04 | 0.04 | 0.13 | 0.04 | 0.03 |
| SR5           | 0.26 | 0.13 | 0.11 | 0.14 | 0.89 | 0.22 | 0.79 | 0.84 | 0.56 | 0.02 | 0.25 | 0.35 | 0.34 | 0.36 | 0.19 | 0.27 | 0.02 | 0.13 | 0.02 | 0.01 |
| SR6           | 0.06 | 0.03 | 0.06 | 0.06 | 0.82 | 0.22 | 0.38 | 0.59 | 0.78 | 0.85 | 0.98 | 0.90 | 0.98 | 0.85 | 0.96 | 0.89 | 0.88 | 0.85 | 0.99 | 0.97 |
| SR8           | 0.06 | 0.13 | 0.09 | 0.07 | 1.00 | 0.85 | 0.99 | 1.00 | 0.87 | 0.36 | 0.47 | 0.49 | 0.06 | 0.36 | 0.21 | 0.11 | 0.03 | 0.05 | 0.01 | 0.01 |
| Sum_Dr1       | 0.51 | 0.85 | 0.38 | 0.56 | 0.69 | 0.02 | 0.25 | 0.34 | 0.74 | 0.57 | 0.82 | 0.77 | 0.83 | 0.22 | 0.74 | 0.65 | 0.75 | 0.57 | 0.85 | 0.85 |
| Sum_Dr2       | 0.48 | 0.22 | 0.26 | 0.27 | 0.81 | 0.36 | 0.50 | 0.44 | 0.73 | 0.57 | 0.80 | 0.79 | 0.89 | 0.22 | 0.73 | 0.73 | 0.77 | 0.22 | 0.81 | 0.82 |
| TCARI         | 0.74 | 0.36 | 0.52 | 0.62 | 0.12 | 0.13 | 0.23 | 0.13 | 0.03 | 0.02 | 0.26 | 0.08 | 0.44 | 0.85 | 0.67 | 0.64 | 0.60 | 0.36 | 0.57 | 0.55 |
| TCARI.OSAVI   | 0.83 | 0.57 | 0.55 | 0.78 | 0.51 | 0.85 | 0.77 | 0.60 | 0.01 | 0.02 | 0.06 | 0.01 | 0.12 | 0.57 | 0.21 | 0.27 | 0.28 | 0.03 | 0.15 | 0.07 |
| TCARI2        | 0.89 | 0.22 | 0.81 | 0.75 | 0.81 | 0.36 | 0.39 | 0.50 | 0.70 | 0.57 | 0.66 | 0.64 | 0.43 | 0.57 | 0.79 | 0.48 | 0.85 | 0.57 | 0.56 | 0.59 |
| TCARI2.OSAVI2 | 0.51 | 0.36 | 0.25 | 0.52 | 0.51 | 0.57 | 0.93 | 0.73 | 0.13 | 0.13 | 0.04 | 0.11 | 0.33 | 0.22 | 0.54 | 0.55 | 0.09 | 0.36 | 0.20 | 0.19 |
| TGI           | 0.94 | 0.57 | 0.89 | 0.92 | 0.75 | 0.57 | 0.93 | 0.85 | 0.04 | 0.36 | 0.02 | 0.03 | 0.62 | 0.57 | 0.93 | 0.77 | 0.25 | 0.85 | 0.30 | 0.34 |
| TVI           | 0.08 | 0.22 | 0.11 | 0.07 | 0.93 | 0.36 | 0.62 | 0.63 | 0.90 | 0.85 | 0.88 | 0.86 | 0.80 | 0.22 | 0.68 | 0.71 | 0.47 | 0.36 | 0.55 | 0.52 |
| Vogelmann     | 0.46 | 0.57 | 0.51 | 0.45 | 0.34 | 0.22 | 0.78 | 0.57 | 0.73 | 0.85 | 0.97 | 0.91 | 0.82 | 0.85 | 0.96 | 0.93 | 0.75 | 0.85 | 0.95 | 0.92 |
| Vogelmann2    | 0.06 | 0.57 | 0.13 | 0.15 | 0.50 | 0.57 | 0.68 | 0.41 | 0.41 | 0.36 | 0.36 | 0.55 | 0.25 | 0.13 | 0.28 | 0.22 | 0.90 | 0.36 | 0.92 | 0.88 |
| Vogelmann3    | 0.25 | 0.85 | 0.48 | 0.46 | 0.72 | 0.85 | 0.72 | 0.77 | 0.54 | 0.57 | 0.84 | 0.67 | 0.83 | 0.85 | 0.92 | 0.88 | 0.16 | 0.85 | 0.81 | 0.45 |
| Vogelmann4    | 0.06 | 0.57 | 0.13 | 0.14 | 0.48 | 0.36 | 0.68 | 0.39 | 0.42 | 0.36 | 0.42 | 0.59 | 0.27 | 0.13 | 0.27 | 0.23 | 0.89 | 0.36 | 0.93 | 0.88 |

Notes: Green color indicates the values for which  $p > 0.05$
