# Supplementary material
Source: MDPI journal article supplement (https://www.mdpi.com/2072-4292/14/10/2442)
Supplement: s1 [file s1]

**Supplementary Table S3.** Paired comparison of invasive and weed species using t-test.

| VI         | <i>Ambrosia vs Atriplex</i> | <i>Ambrosia vs Euphorbia</i> | <i>Ambrosia vs Glycyrrhiza</i> | <i>Ambrosia vs Setaria</i> | <i>Atriplex vs Euphorbia</i> | <i>Atriplex vs Glycyrrhiza</i> | <i>Atriplex vs Setaria</i> | <i>Euphorbia vs Glycyrrhiza</i> | <i>Euphorbia vs Setaria</i> | <i>Glycyrrhiza vs Setaria</i> |
|------------|-----------------------------|------------------------------|--------------------------------|----------------------------|------------------------------|--------------------------------|----------------------------|---------------------------------|-----------------------------|-------------------------------|
| Datt       | $1.7 \times 10^{-09}$       | $9.0 \times 10^{-05}$        | $1.7 \times 10^{-08}$          | $2.8 \times 10^{-08}$      | $3.2 \times 10^{-04}$        | $1.2 \times 10^{-01}$          | $1.4 \times 10^{-01}$      | $6.3 \times 10^{-03}$           | $7.8 \times 10^{-05}$       | $1.3 \times 10^{-02}$         |
| Maccioni   | $3.6 \times 10^{-09}$       | $1.9 \times 10^{-04}$        | $7.8 \times 10^{-09}$          | $7.7 \times 10^{-05}$      | $7.3 \times 10^{-04}$        | $1.4 \times 10^{-01}$          | $3.5 \times 10^{-01}$      | $7.3 \times 10^{-03}$           | $6.5 \times 10^{-02}$       | $9.6 \times 10^{-01}$         |
| D2         | $1.2 \times 10^{-08}$       | $1.9 \times 10^{-02}$        | $2.1 \times 10^{-07}$          | $1.4 \times 10^{-03}$      | $2.7 \times 10^{-04}$        | $8.2 \times 10^{-03}$          | $3.1 \times 10^{-01}$      | $1.1 \times 10^{-02}$           | $5.5 \times 10^{-02}$       | $7.4 \times 10^{-01}$         |
| DD         | $1.9 \times 10^{-08}$       | $7.5 \times 10^{-05}$        | $2.3 \times 10^{-08}$          | $1.2 \times 10^{-05}$      | $2.6 \times 10^{-02}$        | $9.0 \times 10^{-01}$          | $2.1 \times 10^{-01}$      | $3.1 \times 10^{-02}$           | $3.4 \times 10^{-01}$       | $2.5 \times 10^{-01}$         |
| EGFN       | $7.7 \times 10^{-08}$       | $1.1 \times 10^{-03}$        | $3.1 \times 10^{-05}$          | $3.6 \times 10^{-03}$      | $2.9 \times 10^{-04}$        | $3.8 \times 10^{-04}$          | $1.1 \times 10^{-02}$      | $2.8 \times 10^{-01}$           | $6.7 \times 10^{-01}$       | $7.7 \times 10^{-01}$         |
| REP_Li     | $1.3 \times 10^{-07}$       | $1.9 \times 10^{-05}$        | $2.9 \times 10^{-07}$          | $9.2 \times 10^{-04}$      | $7.7 \times 10^{-03}$        | $8.1 \times 10^{-01}$          | $1.8 \times 10^{-01}$      | $7.2 \times 10^{-03}$           | $7.5 \times 10^{-01}$       | $2.0 \times 10^{-01}$         |
| MTCI       | $2.1 \times 10^{-07}$       | $4.5 \times 10^{-04}$        | $2.5 \times 10^{-08}$          | $4.5 \times 10^{-03}$      | $1.4 \times 10^{-03}$        | $2.2 \times 10^{-01}$          | $6.5 \times 10^{-02}$      | $6.9 \times 10^{-03}$           | $5.2 \times 10^{-01}$       | $2.2 \times 10^{-01}$         |
| D1         | $2.6 \times 10^{-07}$       | $4.7 \times 10^{-07}$        | $2.1 \times 10^{-07}$          | $4.6 \times 10^{-12}$      | $4.8 \times 10^{-02}$        | $1.1 \times 10^{-01}$          | $4.8 \times 10^{-06}$      | $5.6 \times 10^{-01}$           | $1.5 \times 10^{-08}$       | $2.7 \times 10^{-08}$         |
| EGFR       | $5.2 \times 10^{-07}$       | $1.4 \times 10^{-03}$        | $1.3 \times 10^{-05}$          | $1.1 \times 10^{-02}$      | $3.3 \times 10^{-04}$        | $8.5 \times 10^{-04}$          | $2.1 \times 10^{-02}$      | $3.3 \times 10^{-01}$           | $5.6 \times 10^{-01}$       | $9.7 \times 10^{-01}$         |
| Vogelmann  | $1.2 \times 10^{-06}$       | $5.6 \times 10^{-08}$        | $2.4 \times 10^{-11}$          | $7.6 \times 10^{-03}$      | $6.4 \times 10^{-01}$        | $2.3 \times 10^{-03}$          | $7.6 \times 10^{-02}$      | $2.8 \times 10^{-03}$           | $3.6 \times 10^{-02}$       | $6.3 \times 10^{-04}$         |
| Vogelmann2 | $2.5 \times 10^{-06}$       | $4.7 \times 10^{-05}$        | $1.9 \times 10^{-07}$          | $4.9 \times 10^{-03}$      | $6.5 \times 10^{-02}$        | $2.7 \times 10^{-01}$          | $2.7 \times 10^{-01}$      | $4.9 \times 10^{-03}$           | $8.5 \times 10^{-01}$       | $7.0 \times 10^{-02}$         |
| Datt2      | $2.7 \times 10^{-06}$       | $2.7 \times 10^{-06}$        | $2.7 \times 10^{-10}$          | $6.5 \times 10^{-03}$      | $5.8 \times 10^{-01}$        | $2.0 \times 10^{-03}$          | $1.4 \times 10^{-01}$      | $2.9 \times 10^{-04}$           | $2.6 \times 10^{-01}$       | $8.7 \times 10^{-04}$         |
| Vogelmann4 | $3.0 \times 10^{-06}$       | $4.6 \times 10^{-05}$        | $1.6 \times 10^{-07}$          | $5.6 \times 10^{-03}$      | $7.4 \times 10^{-02}$        | $2.3 \times 10^{-01}$          | $2.4 \times 10^{-01}$      | $4.4 \times 10^{-03}$           | $9.4 \times 10^{-01}$       | $5.3 \times 10^{-02}$         |
| SR8        | $5.9 \times 10^{-06}$       | $1.6 \times 10^{-03}$        | $1.4 \times 10^{-05}$          | $5.6 \times 10^{-02}$      | $2.0 \times 10^{-07}$        | $3.4 \times 10^{-08}$          | $1.1 \times 10^{-02}$      | $1.6 \times 10^{-02}$           | $8.8 \times 10^{-05}$       | $1.1 \times 10^{-06}$         |
| Carter4    | $1.8 \times 10^{-05}$       | $7.5 \times 10^{-05}$        | $2.3 \times 10^{-08}$          | $6.6 \times 10^{-01}$      | $4.0 \times 10^{-01}$        | $9.2 \times 10^{-03}$          | $6.6 \times 10^{-03}$      | $7.0 \times 10^{-04}$           | $1.8 \times 10^{-02}$       | $3.2 \times 10^{-04}$         |
| SR6        | $1.9 \times 10^{-05}$       | $7.1 \times 10^{-06}$        | $2.9 \times 10^{-10}$          | $3.6 \times 10^{-01}$      | $8.7 \times 10^{-01}$        | $2.8 \times 10^{-03}$          | $6.7 \times 10^{-03}$      | $8.3 \times 10^{-04}$           | $7.4 \times 10^{-03}$       | $5.8 \times 10^{-05}$         |
| OSAVI2     | $3.8 \times 10^{-05}$       | $4.3 \times 10^{-06}$        | $1.8 \times 10^{-09}$          | $8.7 \times 10^{-01}$      | $6.5 \times 10^{-01}$        | $7.5 \times 10^{-04}$          | $3.8 \times 10^{-03}$      | $7.8 \times 10^{-04}$           | $1.8 \times 10^{-03}$       | $4.0 \times 10^{-05}$         |
| NDVI2      | $3.8 \times 10^{-05}$       | $4.4 \times 10^{-06}$        | $1.9 \times 10^{-09}$          | $8.7 \times 10^{-01}$      | $6.5 \times 10^{-01}$        | $7.6 \times 10^{-04}$          | $3.8 \times 10^{-03}$      | $7.8 \times 10^{-04}$           | $1.8 \times 10^{-03}$       | $4.1 \times 10^{-05}$         |
| mSR2       | $5.6 \times 10^{-05}$       | $5.4 \times 10^{-06}$        | $3.0 \times 10^{-10}$          | $7.7 \times 10^{-01}$      | $6.7 \times 10^{-01}$        | $5.9 \times 10^{-04}$          | $3.1 \times 10^{-03}$      | $6.4 \times 10^{-04}$           | $1.3 \times 10^{-03}$       | $9.3 \times 10^{-06}$         |
| Vogelmann3 | $6.2 \times 10^{-05}$       | $1.0 \times 10^{+00}$        | $9.0 \times 10^{-04}$          | $4.1 \times 10^{-01}$      | $1.3 \times 10^{-04}$        | $3.1 \times 10^{-02}$          | $2.8 \times 10^{-03}$      | $2.7 \times 10^{-03}$           | $4.2 \times 10^{-01}$       | $2.0 \times 10^{-02}$         |

|             |                       |                       |                       |                       |                       |                       |                       |                       |                       |                       |
|-------------|-----------------------|-----------------------|-----------------------|-----------------------|-----------------------|-----------------------|-----------------------|-----------------------|-----------------------|-----------------------|
| MCARI       | $1.0 \times 10^{-04}$ | $2.4 \times 10^{-02}$ | $1.5 \times 10^{-02}$ | $2.7 \times 10^{-07}$ | $3.5 \times 10^{-05}$ | $3.8 \times 10^{-04}$ | $2.0 \times 10^{-03}$ | $2.9 \times 10^{-01}$ | $9.6 \times 10^{-07}$ | $4.3 \times 10^{-05}$ |
| CRI4        | $1.1 \times 10^{-04}$ | $7.3 \times 10^{-06}$ | $3.6 \times 10^{-10}$ | $7.8 \times 10^{-01}$ | $4.6 \times 10^{-01}$ | $1.7 \times 10^{-04}$ | $1.4 \times 10^{-03}$ | $4.9 \times 10^{-04}$ | $3.3 \times 10^{-04}$ | $1.6 \times 10^{-06}$ |
| MCARI2      | $1.3 \times 10^{-04}$ | $6.8 \times 10^{-06}$ | $1.5 \times 10^{-10}$ | $7.9 \times 10^{-01}$ | $3.0 \times 10^{-02}$ | $5.8 \times 10^{-06}$ | $1.4 \times 10^{-03}$ | $7.2 \times 10^{-03}$ | $2.8 \times 10^{-05}$ | $1.3 \times 10^{-07}$ |
| TGI         | $1.4 \times 10^{-04}$ | $3.4 \times 10^{-01}$ | $8.6 \times 10^{-02}$ | $7.8 \times 10^{-05}$ | $2.5 \times 10^{-04}$ | $7.2 \times 10^{-07}$ | $1.3 \times 10^{-01}$ | $6.6 \times 10^{-01}$ | $4.9 \times 10^{-05}$ | $3.4 \times 10^{-06}$ |
| GMI2        | $1.6 \times 10^{-04}$ | $2.8 \times 10^{-06}$ | $4.1 \times 10^{-10}$ | $8.7 \times 10^{-01}$ | $2.4 \times 10^{-01}$ | $9.2 \times 10^{-05}$ | $1.8 \times 10^{-03}$ | $6.0 \times 10^{-04}$ | $1.8 \times 10^{-04}$ | $9.5 \times 10^{-07}$ |
| SR1         | $1.6 \times 10^{-04}$ | $2.8 \times 10^{-06}$ | $4.1 \times 10^{-10}$ | $8.7 \times 10^{-01}$ | $2.4 \times 10^{-01}$ | $9.2 \times 10^{-05}$ | $1.8 \times 10^{-03}$ | $6.0 \times 10^{-04}$ | $1.8 \times 10^{-04}$ | $9.5 \times 10^{-07}$ |
| CI2         | $2.1 \times 10^{-04}$ | $1.2 \times 10^{-05}$ | $9.4 \times 10^{-10}$ | $7.2 \times 10^{-01}$ | $4.9 \times 10^{-01}$ | $2.0 \times 10^{-04}$ | $1.5 \times 10^{-03}$ | $3.9 \times 10^{-04}$ | $3.5 \times 10^{-04}$ | $1.3 \times 10^{-06}$ |
| Green_NDVI  | $2.4 \times 10^{-04}$ | $6.0 \times 10^{-05}$ | $6.8 \times 10^{-09}$ | $5.2 \times 10^{-02}$ | $6.3 \times 10^{-01}$ | $1.2 \times 10^{-04}$ | $5.8 \times 10^{-02}$ | $2.5 \times 10^{-04}$ | $2.2 \times 10^{-02}$ | $6.3 \times 10^{-06}$ |
| CI          | $5.0 \times 10^{-04}$ | $2.7 \times 10^{-11}$ | $1.0 \times 10^{-10}$ | $2.4 \times 10^{-01}$ | $8.2 \times 10^{-09}$ | $4.6 \times 10^{-08}$ | $6.2 \times 10^{-03}$ | $1.4 \times 10^{-01}$ | $6.3 \times 10^{-11}$ | $2.7 \times 10^{-10}$ |
| Carter2     | $5.6 \times 10^{-04}$ | $9.2 \times 10^{-06}$ | $7.2 \times 10^{-08}$ | $3.8 \times 10^{-01}$ | $1.0 \times 10^{-01}$ | $8.7 \times 10^{-05}$ | $2.6 \times 10^{-03}$ | $6.6 \times 10^{-04}$ | $4.0 \times 10^{-04}$ | $2.6 \times 10^{-05}$ |
| CRI3        | $6.8 \times 10^{-04}$ | $1.8 \times 10^{-04}$ | $1.7 \times 10^{-08}$ | $2.9 \times 10^{-01}$ | $6.9 \times 10^{-01}$ | $1.3 \times 10^{-04}$ | $1.0 \times 10^{-02}$ | $2.3 \times 10^{-04}$ | $3.5 \times 10^{-03}$ | $2.3 \times 10^{-07}$ |
| GMI1        | $9.2 \times 10^{-04}$ | $6.2 \times 10^{-05}$ | $1.2 \times 10^{-08}$ | $2.8 \times 10^{-01}$ | $4.1 \times 10^{-01}$ | $7.9 \times 10^{-05}$ | $1.6 \times 10^{-02}$ | $3.0 \times 10^{-04}$ | $1.8 \times 10^{-03}$ | $2.2 \times 10^{-07}$ |
| SR3         | $9.2 \times 10^{-04}$ | $6.2 \times 10^{-05}$ | $1.2 \times 10^{-08}$ | $2.8 \times 10^{-01}$ | $4.1 \times 10^{-01}$ | $7.9 \times 10^{-05}$ | $1.6 \times 10^{-02}$ | $3.0 \times 10^{-04}$ | $1.8 \times 10^{-03}$ | $2.2 \times 10^{-07}$ |
| TCARI       | $1.2 \times 10^{-03}$ | $2.1 \times 10^{-01}$ | $9.1 \times 10^{-01}$ | $6.8 \times 10^{-06}$ | $1.7 \times 10^{-04}$ | $2.6 \times 10^{-04}$ | $2.1 \times 10^{-02}$ | $1.3 \times 10^{-01}$ | $2.5 \times 10^{-06}$ | $8.2 \times 10^{-07}$ |
| SR2         | $1.3 \times 10^{-03}$ | $5.9 \times 10^{-07}$ | $1.1 \times 10^{-08}$ | $3.7 \times 10^{-01}$ | $8.1 \times 10^{-03}$ | $5.2 \times 10^{-06}$ | $1.3 \times 10^{-03}$ | $1.2 \times 10^{-03}$ | $4.5 \times 10^{-06}$ | $2.1 \times 10^{-08}$ |
| CARI        | $1.4 \times 10^{-03}$ | $5.5 \times 10^{-01}$ | $9.7 \times 10^{-01}$ | $1.4 \times 10^{-03}$ | $3.6 \times 10^{-04}$ | $1.3 \times 10^{-03}$ | $8.5 \times 10^{-01}$ | $5.2 \times 10^{-01}$ | $3.4 \times 10^{-04}$ | $1.2 \times 10^{-03}$ |
| TCARI.OSAVI | $1.4 \times 10^{-03}$ | $2.5 \times 10^{-01}$ | $2.1 \times 10^{-03}$ | $1.4 \times 10^{-03}$ | $6.1 \times 10^{-03}$ | $5.5 \times 10^{-01}$ | $8.8 \times 10^{-01}$ | $5.8 \times 10^{-03}$ | $4.7 \times 10^{-03}$ | $6.2 \times 10^{-01}$ |
| TCARI2      | $1.6 \times 10^{-03}$ | $2.6 \times 10^{-06}$ | $1.0 \times 10^{-07}$ | $3.6 \times 10^{-01}$ | $4.8 \times 10^{-03}$ | $1.4 \times 10^{-04}$ | $4.1 \times 10^{-03}$ | $3.6 \times 10^{-01}$ | $5.0 \times 10^{-05}$ | $3.4 \times 10^{-05}$ |
| Datt6       | $1.8 \times 10^{-03}$ | $3.3 \times 10^{-02}$ | $4.5 \times 10^{-06}$ | $1.4 \times 10^{-02}$ | $6.1 \times 10^{-02}$ | $2.0 \times 10^{-01}$ | $3.5 \times 10^{-01}$ | $2.4 \times 10^{-04}$ | $3.6 \times 10^{-01}$ | $2.0 \times 10^{-02}$ |
| Boochs2     | $2.2 \times 10^{-03}$ | $1.7 \times 10^{-05}$ | $8.2 \times 10^{-10}$ | $5.9 \times 10^{-02}$ | $1.8 \times 10^{-02}$ | $1.4 \times 10^{-05}$ | $2.6 \times 10^{-04}$ | $2.4 \times 10^{-02}$ | $3.5 \times 10^{-06}$ | $8.3 \times 10^{-08}$ |
| Datt4       | $4.9 \times 10^{-03}$ | $1.5 \times 10^{-02}$ | $1.3 \times 10^{-02}$ | $6.5 \times 10^{-05}$ | $3.0 \times 10^{-05}$ | $2.7 \times 10^{-05}$ | $1.9 \times 10^{-02}$ | $9.8 \times 10^{-01}$ | $2.0 \times 10^{-06}$ | $2.0 \times 10^{-06}$ |
| Carter5     | $7.8 \times 10^{-03}$ | $1.3 \times 10^{-01}$ | $1.0 \times 10^{-02}$ | $1.7 \times 10^{-05}$ | $5.5 \times 10^{-05}$ | $8.9 \times 10^{-04}$ | $1.1 \times 10^{-03}$ | $4.3 \times 10^{-02}$ | $2.1 \times 10^{-07}$ | $7.2 \times 10^{-05}$ |
| SR          | $1.1 \times 10^{-02}$ | $2.2 \times 10^{-06}$ | $2.5 \times 10^{-06}$ | $1.7 \times 10^{-01}$ | $2.3 \times 10^{-03}$ | $2.9 \times 10^{-05}$ | $1.9 \times 10^{-03}$ | $2.8 \times 10^{-03}$ | $1.9 \times 10^{-06}$ | $3.5 \times 10^{-07}$ |
| PSRI        | $1.3 \times 10^{-02}$ | $7.2 \times 10^{-05}$ | $2.9 \times 10^{-05}$ | $1.4 \times 10^{-02}$ | $1.6 \times 10^{-02}$ | $4.2 \times 10^{-03}$ | $6.3 \times 10^{-04}$ | $3.8 \times 10^{-01}$ | $1.1 \times 10^{-04}$ | $7.6 \times 10^{-05}$ |
| NDVI        | $1.3 \times 10^{-02}$ | $7.2 \times 10^{-06}$ | $3.5 \times 10^{-08}$ | $1.6 \times 10^{-01}$ | $2.5 \times 10^{-03}$ | $3.1 \times 10^{-06}$ | $3.4 \times 10^{-03}$ | $1.2 \times 10^{-03}$ | $5.8 \times 10^{-05}$ | $1.7 \times 10^{-06}$ |
| Gitelson    | $1.6 \times 10^{-02}$ | $6.4 \times 10^{-01}$ | $1.0 \times 10^{-02}$ | $2.8 \times 10^{-01}$ | $1.8 \times 10^{-02}$ | $6.2 \times 10^{-01}$ | $1.2 \times 10^{-01}$ | $3.6 \times 10^{-03}$ | $4.1 \times 10^{-01}$ | $1.3 \times 10^{-01}$ |
| PSSR        | $3.0 \times 10^{-02}$ | $4.0 \times 10^{-06}$ | $3.6 \times 10^{-06}$ | $1.4 \times 10^{-01}$ | $1.2 \times 10^{-03}$ | $2.4 \times 10^{-05}$ | $3.1 \times 10^{-03}$ | $2.4 \times 10^{-03}$ | $1.8 \times 10^{-06}$ | $5.2 \times 10^{-07}$ |
| SR4         | $4.1 \times 10^{-02}$ | $7.7 \times 10^{-03}$ | $2.5 \times 10^{-03}$ | $4.0 \times 10^{-05}$ | $1.8 \times 10^{-05}$ | $4.8 \times 10^{-04}$ | $8.3 \times 10^{-04}$ | $3.8 \times 10^{-02}$ | $5.3 \times 10^{-08}$ | $3.5 \times 10^{-05}$ |
| Carter3     | $4.3 \times 10^{-02}$ | $3.5 \times 10^{-05}$ | $9.5 \times 10^{-08}$ | $1.1 \times 10^{-01}$ | $3.6 \times 10^{-03}$ | $2.4 \times 10^{-06}$ | $4.8 \times 10^{-03}$ | $4.3 \times 10^{-04}$ | $9.2 \times 10^{-05}$ | $2.9 \times 10^{-06}$ |
| PRI.CI2     | $4.4 \times 10^{-02}$ | $9.8 \times 10^{-05}$ | $3.0 \times 10^{-04}$ | $5.3 \times 10^{-08}$ | $1.5 \times 10^{-05}$ | $2.7 \times 10^{-05}$ | $3.9 \times 10^{-04}$ | $5.7 \times 10^{-02}$ | $8.4 \times 10^{-10}$ | $7.1 \times 10^{-07}$ |
| Carter6     | $5.1 \times 10^{-02}$ | $8.7 \times 10^{-01}$ | $1.7 \times 10^{-02}$ | $9.4 \times 10^{-02}$ | $3.6 \times 10^{-02}$ | $7.8 \times 10^{-01}$ | $7.1 \times 10^{-01}$ | $5.2 \times 10^{-03}$ | $7.6 \times 10^{-02}$ | $4.5 \times 10^{-01}$ |
| RDVI        | $6.1 \times 10^{-02}$ | $3.5 \times 10^{-06}$ | $9.2 \times 10^{-09}$ | $3.3 \times 10^{-02}$ | $1.5 \times 10^{-04}$ | $2.8 \times 10^{-07}$ | $2.3 \times 10^{-03}$ | $2.0 \times 10^{-02}$ | $2.2 \times 10^{-06}$ | $9.0 \times 10^{-08}$ |

|               |                       |                       |                       |                       |                       |                       |                       |                       |                       |                       |
|---------------|-----------------------|-----------------------|-----------------------|-----------------------|-----------------------|-----------------------|-----------------------|-----------------------|-----------------------|-----------------------|
| PARS          | $6.5 \times 10^{-02}$ | $4.7 \times 10^{-06}$ | $7.0 \times 10^{-07}$ | $8.5 \times 10^{-01}$ | $1.2 \times 10^{-03}$ | $4.4 \times 10^{-06}$ | $1.3 \times 10^{-01}$ | $5.2 \times 10^{-04}$ | $3.6 \times 10^{-05}$ | $6.3 \times 10^{-07}$ |
| SAVI          | $7.5 \times 10^{-02}$ | $7.6 \times 10^{-05}$ | $2.8 \times 10^{-07}$ | $5.0 \times 10^{-02}$ | $2.6 \times 10^{-03}$ | $3.5 \times 10^{-06}$ | $3.1 \times 10^{-03}$ | $1.3 \times 10^{-03}$ | $6.6 \times 10^{-05}$ | $1.5 \times 10^{-06}$ |
| DDn           | $7.6 \times 10^{-02}$ | $4.3 \times 10^{-03}$ | $1.1 \times 10^{-03}$ | $4.8 \times 10^{-01}$ | $1.9 \times 10^{-01}$ | $6.9 \times 10^{-02}$ | $2.2 \times 10^{-01}$ | $8.1 \times 10^{-01}$ | $1.3 \times 10^{-02}$ | $2.0 \times 10^{-03}$ |
| OSAVI         | $7.6 \times 10^{-02}$ | $8.3 \times 10^{-05}$ | $3.0 \times 10^{-07}$ | $5.0 \times 10^{-02}$ | $2.7 \times 10^{-03}$ | $3.7 \times 10^{-06}$ | $3.2 \times 10^{-03}$ | $1.3 \times 10^{-03}$ | $6.9 \times 10^{-05}$ | $1.6 \times 10^{-06}$ |
| MSAVI         | $8.1 \times 10^{-02}$ | $1.7 \times 10^{-04}$ | $9.8 \times 10^{-07}$ | $5.4 \times 10^{-02}$ | $2.9 \times 10^{-03}$ | $4.0 \times 10^{-06}$ | $4.5 \times 10^{-03}$ | $1.2 \times 10^{-03}$ | $1.9 \times 10^{-04}$ | $1.1 \times 10^{-05}$ |
| SR5           | $1.1 \times 10^{-01}$ | $1.8 \times 10^{-03}$ | $9.3 \times 10^{-05}$ | $1.8 \times 10^{-04}$ | $6.8 \times 10^{-06}$ | $6.3 \times 10^{-06}$ | $2.0 \times 10^{-03}$ | $2.3 \times 10^{-02}$ | $1.1 \times 10^{-06}$ | $7.4 \times 10^{-08}$ |
| CIAInt        | $1.1 \times 10^{-01}$ | $6.5 \times 10^{-01}$ | $2.4 \times 10^{-02}$ | $6.8 \times 10^{-01}$ | $1.2 \times 10^{-01}$ | $4.4 \times 10^{-01}$ | $2.1 \times 10^{-01}$ | $3.3 \times 10^{-03}$ | $9.8 \times 10^{-01}$ | $3.9 \times 10^{-02}$ |
| Sum_Dr2       | $1.2 \times 10^{-01}$ | $1.1 \times 10^{-05}$ | $1.1 \times 10^{-08}$ | $4.1 \times 10^{-02}$ | $1.9 \times 10^{-04}$ | $6.3 \times 10^{-07}$ | $2.8 \times 10^{-03}$ | $1.9 \times 10^{-01}$ | $6.9 \times 10^{-07}$ | $1.5 \times 10^{-08}$ |
| EVI           | $1.3 \times 10^{-01}$ | $7.2 \times 10^{-05}$ | $9.4 \times 10^{-03}$ | $1.2 \times 10^{-01}$ | $2.5 \times 10^{-03}$ | $1.4 \times 10^{-02}$ | $9.3 \times 10^{-03}$ | $3.6 \times 10^{-02}$ | $7.4 \times 10^{-06}$ | $6.5 \times 10^{-03}$ |
| SPVI          | $1.5 \times 10^{-01}$ | $1.7 \times 10^{-05}$ | $1.6 \times 10^{-08}$ | $2.6 \times 10^{-02}$ | $4.2 \times 10^{-04}$ | $2.6 \times 10^{-06}$ | $3.8 \times 10^{-03}$ | $1.6 \times 10^{-01}$ | $5.0 \times 10^{-06}$ | $1.6 \times 10^{-06}$ |
| MPRI          | $2.3 \times 10^{-01}$ | $3.6 \times 10^{-01}$ | $2.3 \times 10^{-03}$ | $2.0 \times 10^{-01}$ | $5.8 \times 10^{-01}$ | $2.3 \times 10^{-02}$ | $9.3 \times 10^{-01}$ | $3.3 \times 10^{-04}$ | $5.1 \times 10^{-01}$ | $2.5 \times 10^{-02}$ |
| Datt5         | $2.4 \times 10^{-01}$ | $3.1 \times 10^{-03}$ | $1.8 \times 10^{-04}$ | $7.0 \times 10^{-04}$ | $1.1 \times 10^{-04}$ | $1.3 \times 10^{-05}$ | $2.6 \times 10^{-03}$ | $7.8 \times 10^{-02}$ | $3.0 \times 10^{-05}$ | $4.2 \times 10^{-06}$ |
| Datt3         | $2.7 \times 10^{-01}$ | $1.0 \times 10^{-05}$ | $1.4 \times 10^{-03}$ | $7.3 \times 10^{-05}$ | $7.9 \times 10^{-06}$ | $4.7 \times 10^{-03}$ | $2.9 \times 10^{-04}$ | $6.7 \times 10^{-06}$ | $3.0 \times 10^{-01}$ | $2.7 \times 10^{-02}$ |
| CRI1          | $2.8 \times 10^{-01}$ | $3.4 \times 10^{-02}$ | $4.9 \times 10^{-05}$ | $8.4 \times 10^{-01}$ | $7.8 \times 10^{-04}$ | $6.3 \times 10^{-06}$ | $1.9 \times 10^{-01}$ | $8.4 \times 10^{-04}$ | $4.8 \times 10^{-02}$ | $6.4 \times 10^{-05}$ |
| Sum_Dr1       | $2.9 \times 10^{-01}$ | $1.1 \times 10^{-05}$ | $3.4 \times 10^{-08}$ | $6.8 \times 10^{-02}$ | $6.5 \times 10^{-05}$ | $3.8 \times 10^{-07}$ | $9.3 \times 10^{-03}$ | $4.0 \times 10^{-01}$ | $7.0 \times 10^{-07}$ | $6.4 \times 10^{-09}$ |
| DPI           | $4.3 \times 10^{-01}$ | $1.2 \times 10^{-05}$ | $6.0 \times 10^{-03}$ | $3.2 \times 10^{-04}$ | $2.5 \times 10^{-05}$ | $5.2 \times 10^{-03}$ | $1.3 \times 10^{-04}$ | $7.6 \times 10^{-04}$ | $4.1 \times 10^{-01}$ | $6.9 \times 10^{-03}$ |
| GI            | $4.5 \times 10^{-01}$ | $3.4 \times 10^{-04}$ | $2.1 \times 10^{-04}$ | $5.4 \times 10^{-04}$ | $5.8 \times 10^{-05}$ | $8.4 \times 10^{-05}$ | $1.6 \times 10^{-03}$ | $1.1 \times 10^{-01}$ | $6.8 \times 10^{-07}$ | $5.6 \times 10^{-07}$ |
| TCARI2.OSAVI2 | $4.7 \times 10^{-01}$ | $2.7 \times 10^{-02}$ | $6.4 \times 10^{-01}$ | $3.4 \times 10^{-02}$ | $6.2 \times 10^{-03}$ | $1.8 \times 10^{-01}$ | $1.4 \times 10^{-01}$ | $2.1 \times 10^{-02}$ | $2.6 \times 10^{-04}$ | $6.8 \times 10^{-03}$ |
| MTVI          | $5.3 \times 10^{-01}$ | $4.0 \times 10^{-05}$ | $1.4 \times 10^{-07}$ | $8.1 \times 10^{-03}$ | $1.4 \times 10^{-04}$ | $7.0 \times 10^{-07}$ | $3.2 \times 10^{-03}$ | $1.9 \times 10^{-01}$ | $1.1 \times 10^{-06}$ | $9.7 \times 10^{-08}$ |
| Boochs        | $6.1 \times 10^{-01}$ | $1.3 \times 10^{-05}$ | $1.4 \times 10^{-07}$ | $6.0 \times 10^{-05}$ | $6.8 \times 10^{-06}$ | $8.1 \times 10^{-08}$ | $2.1 \times 10^{-04}$ | $7.8 \times 10^{-01}$ | $2.1 \times 10^{-08}$ | $2.2 \times 10^{-10}$ |
| PSND          | $6.7 \times 10^{-01}$ | $2.5 \times 10^{-03}$ | $1.1 \times 10^{-07}$ | $7.8 \times 10^{-01}$ | $4.5 \times 10^{-03}$ | $1.2 \times 10^{-07}$ | $9.2 \times 10^{-01}$ | $7.3 \times 10^{-06}$ | $1.4 \times 10^{-02}$ | $1.0 \times 10^{-06}$ |
| PRI           | $6.9 \times 10^{-01}$ | $3.0 \times 10^{-05}$ | $7.8 \times 10^{-06}$ | $7.2 \times 10^{-05}$ | $9.4 \times 10^{-05}$ | $9.9 \times 10^{-06}$ | $1.3 \times 10^{-04}$ | $6.3 \times 10^{-02}$ | $1.0 \times 10^{-06}$ | $7.5 \times 10^{-08}$ |
| TVI           | $6.9 \times 10^{-01}$ | $4.2 \times 10^{-05}$ | $1.9 \times 10^{-07}$ | $2.1 \times 10^{-03}$ | $1.0 \times 10^{-04}$ | $8.6 \times 10^{-07}$ | $1.3 \times 10^{-03}$ | $2.9 \times 10^{-01}$ | $3.4 \times 10^{-07}$ | $3.4 \times 10^{-08}$ |
| CRI2          | $7.1 \times 10^{-01}$ | $4.7 \times 10^{-01}$ | $7.1 \times 10^{-04}$ | $2.2 \times 10^{-01}$ | $7.7 \times 10^{-01}$ | $1.2 \times 10^{-03}$ | $3.5 \times 10^{-01}$ | $3.2 \times 10^{-04}$ | $3.9 \times 10^{-01}$ | $2.6 \times 10^{-02}$ |
| DWSI4         | $7.4 \times 10^{-01}$ | $7.5 \times 10^{-05}$ | $5.5 \times 10^{-05}$ | $1.2 \times 10^{-03}$ | $3.8 \times 10^{-05}$ | $3.6 \times 10^{-05}$ | $2.0 \times 10^{-03}$ | $1.4 \times 10^{-01}$ | $9.3 \times 10^{-07}$ | $2.9 \times 10^{-07}$ |
| Gitelson2     | $7.5 \times 10^{-01}$ | $3.0 \times 10^{-09}$ | $2.4 \times 10^{-07}$ | $7.3 \times 10^{-02}$ | $1.9 \times 10^{-05}$ | $7.6 \times 10^{-06}$ | $1.5 \times 10^{-01}$ | $3.9 \times 10^{-01}$ | $1.7 \times 10^{-10}$ | $4.3 \times 10^{-08}$ |
| PRI_norm      | $7.5 \times 10^{-01}$ | $3.3 \times 10^{-04}$ | $4.7 \times 10^{-05}$ | $9.4 \times 10^{-04}$ | $3.9 \times 10^{-04}$ | $6.8 \times 10^{-05}$ | $1.2 \times 10^{-03}$ | $9.5 \times 10^{-02}$ | $1.2 \times 10^{-04}$ | $7.3 \times 10^{-05}$ |
| NDVI3         | $1.0 \times 10^{+00}$ | $3.2 \times 10^{-05}$ | $6.9 \times 10^{-06}$ | $2.9 \times 10^{-03}$ | $3.2 \times 10^{-05}$ | $7.0 \times 10^{-06}$ | $2.9 \times 10^{-03}$ | $1.8 \times 10^{-01}$ | $6.9 \times 10^{-06}$ | $1.3 \times 10^{-06}$ |

Notes: Red color indicates the values for which  $p > 0.05$
