# Supplementary material
Source: MDPI journal article supplement (https://www.mdpi.com/2072-4292/14/10/2442)
Supplement: s1 [file s1]

**Supplementary Table S2.** ANOVA test of invasive and weed species.

| ANOVA      | Df    |           | Sum Sq   |           | Mean Sq  |           | F value | Pr(>F) |
|------------|-------|-----------|----------|-----------|----------|-----------|---------|--------|
|            | Weeds | Residuals | Weeds    | Residuals | Weeds    | Residuals |         |        |
| Boochs     | 4     | 95        | 31.41    | 7.77      | 7.85     | 0.08      | 96.04   | 0.00   |
| Boochs2    | 4     | 95        | 23.35    | 8.26      | 5.84     | 0.09      | 67.13   | 0.00   |
| CARI       | 4     | 95        | 3412.35  | 5656.11   | 853.09   | 59.54     | 14.33   | 0.00   |
| Carter2    | 4     | 95        | 0.40     | 0.20      | 0.10     | 0.00      | 48.28   | 0.00   |
| Carter3    | 4     | 95        | 0.22     | 0.09      | 0.06     | 0.00      | 57.39   | 0.00   |
| Carter4    | 4     | 95        | 0.18     | 0.13      | 0.05     | 0.00      | 31.90   | 0.00   |
| Carter5    | 4     | 95        | 3.11     | 1.81      | 0.78     | 0.02      | 40.66   | 0.00   |
| Carter6    | 4     | 95        | 64.28    | 300.81    | 16.07    | 3.17      | 5.08    | 0.04   |
| CI         | 4     | 95        | 0.04     | 0.00      | 0.01     | 0.00      | 188.51  | 0.00   |
| CI2        | 4     | 95        | 4.95     | 2.33      | 1.24     | 0.02      | 50.50   | 0.00   |
| CIAInt     | 4     | 95        | 95030.53 | 539314.33 | 23757.63 | 5676.99   | 4.18    | 0.08   |
| CRI1       | 4     | 95        | 0.00     | 0.00      | 0.00     | 0.00      | 38.06   | 0.00   |
| CRI2       | 4     | 95        | 0.00     | 0.01      | 0.00     | 0.00      | 11.15   | 0.00   |
| CRI3       | 4     | 95        | 13.42    | 6.96      | 3.35     | 0.07      | 45.77   | 0.00   |
| CRI4       | 4     | 95        | 5.03     | 2.26      | 1.26     | 0.02      | 52.78   | 0.00   |
| D1         | 4     | 95        | 1.86     | 0.25      | 0.47     | 0.00      | 176.79  | 0.00   |
| D2         | 4     | 95        | 0.94     | 0.77      | 0.23     | 0.01      | 28.74   | 0.00   |
| Datt       | 4     | 95        | 0.13     | 0.04      | 0.03     | 0.00      | 70.51   | 0.00   |
| Datt2      | 4     | 95        | 1.46     | 0.88      | 0.36     | 0.01      | 39.47   | 0.00   |
| Datt3      | 4     | 95        | 0.21     | 0.11      | 0.05     | 0.00      | 43.88   | 0.00   |
| Datt4      | 4     | 95        | 0.00     | 0.00      | 0.00     | 0.00      | 43.50   | 0.00   |
| Datt5      | 4     | 95        | 1.86     | 0.83      | 0.47     | 0.01      | 53.01   | 0.00   |
| Datt6      | 4     | 95        | 0.03     | 0.05      | 0.01     | 0.00      | 13.80   | 0.00   |
| DD         | 4     | 95        | 368.06   | 225.77    | 92.02    | 2.38      | 38.72   | 0.00   |
| DDn        | 4     | 95        | 1103.46  | 2022.24   | 275.86   | 21.29     | 12.96   | 0.00   |
| DPI        | 4     | 95        | 0.42     | 0.26      | 0.11     | 0.00      | 38.17   | 0.00   |
| DWSI4      | 4     | 95        | 1.67     | 0.69      | 0.42     | 0.01      | 57.32   | 0.00   |
| EGFN       | 4     | 95        | 0.11     | 0.09      | 0.03     | 0.00      | 28.56   | 0.00   |
| EGFR       | 4     | 95        | 24.94    | 24.13     | 6.24     | 0.25      | 24.55   | 0.00   |
| EVI        | 4     | 95        | 62.93    | 64.55     | 15.73    | 0.68      | 23.15   | 0.00   |
| GI         | 4     | 95        | 1.98     | 0.87      | 0.49     | 0.01      | 53.93   | 0.00   |
| Gitelson   | 4     | 95        | 0.00     | 0.00      | 0.00     | 0.00      | 5.29    | 0.07   |
| Gitelson2  | 4     | 95        | 6.33     | 1.67      | 1.58     | 0.02      | 89.93   | 0.00   |
| GMI1       | 4     | 95        | 14.20    | 7.09      | 3.55     | 0.07      | 47.57   | 0.00   |
| GMI2       | 4     | 95        | 5.41     | 2.34      | 1.35     | 0.02      | 55.00   | 0.00   |
| Green NDVI | 4     | 95        | 0.12     | 0.07      | 0.03     | 0.00      | 41.68   | 0.00   |
| Maccioni   | 4     | 95        | 0.10     | 0.06      | 0.02     | 0.00      | 38.55   | 0.00   |
| MCARI      | 4     | 95        | 3026.55  | 1609.86   | 756.64   | 16.95     | 44.65   | 0.00   |
| MCARI2     | 4     | 95        | 6069.55  | 2161.05   | 1517.39  | 22.75     | 66.70   | 0.00   |
| MPRI       | 4     | 95        | 54.06    | 181.97    | 13.51    | 1.92      | 7.06    | 0.05   |
| MSAVI      | 4     | 95        | 0.29     | 0.14      | 0.07     | 0.00      | 50.77   | 0.00   |
| mSR2       | 4     | 95        | 3.02     | 1.54      | 0.76     | 0.02      | 46.76   | 0.00   |
| MTCI       | 4     | 95        | 1.54     | 1.43      | 0.38     | 0.02      | 25.43   | 0.00   |

|               |   |    |             |            |            |          |       |      |
|---------------|---|----|-------------|------------|------------|----------|-------|------|
| MTVI          | 4 | 95 | 12472.81    | 4732.16    | 3118.20    | 49.81    | 62.60 | 0.00 |
| NDVI          | 4 | 95 | 0.50        | 0.20       | 0.13       | 0.00     | 59.64 | 0.00 |
| NDVI2         | 4 | 95 | 0.17        | 0.09       | 0.04       | 0.00     | 43.89 | 0.00 |
| NDVI3         | 4 | 95 | 0.37        | 0.15       | 0.09       | 0.00     | 58.54 | 0.00 |
| OSAVI         | 4 | 95 | 0.65        | 0.28       | 0.16       | 0.00     | 55.50 | 0.00 |
| OSAVI2        | 4 | 95 | 0.23        | 0.13       | 0.06       | 0.00     | 43.98 | 0.00 |
| PARS          | 4 | 95 | 56.56       | 19.82      | 14.14      | 0.21     | 67.77 | 0.00 |
| PRI           | 4 | 95 | 0.04        | 0.01       | 0.01       | 0.00     | 83.93 | 0.00 |
| PRI*CI2       | 4 | 95 | 0.02        | 0.01       | 0.01       | 0.00     | 64.61 | 0.00 |
| PRI_norm      | 4 | 95 | 0.00        | 0.00       | 0.00       | 0.00     | 59.52 | 0.00 |
| PSND          | 4 | 95 | 0.12        | 0.05       | 0.03       | 0.00     | 55.80 | 0.00 |
| PSRI          | 4 | 95 | 0.14        | 0.07       | 0.04       | 0.00     | 47.48 | 0.00 |
| PSSR          | 4 | 95 | 86.46       | 32.21      | 21.61      | 0.34     | 63.76 | 0.00 |
| RDVI          | 4 | 95 | 42.35       | 13.60      | 10.59      | 0.14     | 73.98 | 0.00 |
| REP_Li        | 4 | 95 | 294.21      | 211.43     | 73.55      | 2.23     | 33.05 | 0.00 |
| SAVI          | 4 | 95 | 1.07        | 0.46       | 0.27       | 0.00     | 55.87 | 0.00 |
| SPVI          | 4 | 95 | 8092.97     | 3155.26    | 2023.24    | 33.21    | 60.92 | 0.00 |
| SR            | 4 | 95 | 77.84       | 29.27      | 19.46      | 0.31     | 63.16 | 0.00 |
| SR1           | 4 | 95 | 5.41        | 2.34       | 1.35       | 0.02     | 55.00 | 0.00 |
| SR2           | 4 | 95 | 24.46       | 8.44       | 6.12       | 0.09     | 68.87 | 0.00 |
| SR3           | 4 | 95 | 14.20       | 7.09       | 3.55       | 0.07     | 47.57 | 0.00 |
| SR4           | 4 | 95 | 7.10        | 3.60       | 1.78       | 0.04     | 46.83 | 0.00 |
| SR5           | 4 | 95 | 0.43        | 0.15       | 0.11       | 0.00     | 69.30 | 0.00 |
| SR6           | 4 | 95 | 1.09        | 0.64       | 0.27       | 0.01     | 40.36 | 0.00 |
| SR8           | 4 | 95 | 0.12        | 0.04       | 0.03       | 0.00     | 82.06 | 0.00 |
| Sum_Dr1       | 4 | 95 | 4411.17     | 1570.51    | 1102.79    | 16.53    | 66.71 | 0.00 |
| Sum_Dr2       | 4 | 95 | 3742.66     | 1303.98    | 935.67     | 13.73    | 68.17 | 0.00 |
| TCARI         | 4 | 95 | 1093.60     | 738.34     | 273.40     | 7.77     | 35.18 | 0.00 |
| TCARI/OSAVI   | 4 | 95 | 1082.85     | 1950.82    | 270.71     | 20.53    | 13.18 | 0.00 |
| TCARI2        | 4 | 95 | 2293.13     | 1101.32    | 573.28     | 11.59    | 49.45 | 0.00 |
| TCARI2/OSAVI2 | 4 | 95 | 3056.11     | 7064.84    | 764.03     | 74.37    | 10.27 | 0.00 |
| TGI           | 4 | 95 | 893711.23   | 582378.29  | 223427.81  | 6130.30  | 36.45 | 0.00 |
| TVI           | 4 | 95 | 17701683.20 | 6225905.04 | 4425420.80 | 65535.84 | 67.53 | 0.00 |
| Vogelmann     | 4 | 95 | 0.20        | 0.10       | 0.05       | 0.00     | 47.35 | 0.00 |
| Vogelmann2    | 4 | 95 | 0.00        | 0.00       | 0.00       | 0.00     | 23.51 | 0.00 |
| Vogelmann3    | 4 | 95 | 0.30        | 0.45       | 0.08       | 0.00     | 15.93 | 0.00 |
| Vogelmann4    | 4 | 95 | 0.01        | 0.01       | 0.00       | 0.00     | 23.85 | 0.00 |
