# Supplementary material
Source: MDPI journal article supplement (https://www.mdpi.com/2072-4292/14/10/2442)
Supplement: s1 [file s1]

**Supplementary Table S5.** Factor loads on 5 significant components for *Ambrosia artemisiifolia*, *Atriplex tatarica*, *Glycyrrhiza glabra*, *Euphorbia seguieriana*, *Setaria pumila*.

| VI         | Comp.1 | Comp.2 | Comp.3 | Comp.4 | Comp.5 |
|------------|--------|--------|--------|--------|--------|
| Boochs     | 0.12   | 0.119  |        |        | 0.103  |
| Boochs2    | 0.136  |        |        |        |        |
| CARI       |        | 0.22   |        | 0.108  |        |
| Carter2    | -0.14  |        |        |        |        |
| Carter3    | -0.14  |        |        |        |        |
| Carter4    | -0.131 |        |        |        |        |
| Carter5    | 0.115  |        | -0.158 |        |        |
| Carter6    |        | 0.19   | 0.217  |        |        |
| CI         | 0.124  |        |        | 0.134  | 0.211  |
| CI2        | 0.14   |        |        |        |        |
| CIAInt     |        | 0.143  | 0.211  | 0.107  |        |
| CRI1       | 0.109  |        | -0.211 | 0.153  | -0.185 |
| CRI2       |        | -0.1   | -0.279 | 0.148  |        |
| CRI3       | -0.13  |        |        |        |        |
| CRI4       | -0.14  |        |        |        |        |
| D1         |        | -0.154 | 0.182  | 0.27   | -0.154 |
| D2         |        | 0.189  | -0.175 |        | 0.181  |
| Datt       |        | -0.202 | 0.17   | 0.118  | -0.164 |
| Datt2      | 0.121  | -0.113 |        |        |        |
| Datt3      |        |        | -0.122 | -0.426 | -0.149 |
| Datt4      |        | -0.179 |        |        |        |
| Datt5      | -0.123 |        |        | 0.123  |        |
| Datt6      |        | -0.176 | -0.117 |        |        |
| DD         |        | -0.182 | 0.147  |        |        |
| DDn        |        |        | -0.314 |        |        |
| DPI        |        |        |        | -0.447 |        |
| DWSI4      | 0.129  |        |        |        |        |
| EGFN       |        | -0.19  |        |        | 0.441  |
| EGFR       |        | -0.187 |        |        | 0.468  |
| EVI        | -0.11  |        | 0.11   | -0.113 | 0.201  |
| GI         | 0.128  |        |        |        |        |
| Gitelson   |        | -0.177 | -0.16  | -0.123 |        |
| Gitelson2  | -0.11  |        |        | -0.167 | -0.237 |
| GMI1       | 0.131  |        |        |        |        |
| GMI2       | 0.14   |        |        |        |        |
| Green NDVI | 0.125  |        |        |        |        |
| Maccioni   |        | -0.191 | 0.173  |        | -0.129 |
| MCARI      | 0.104  | 0.15   |        |        |        |
| MCARI2     | 0.139  |        |        |        |        |
| MPRI       |        | 0.142  | 0.241  |        |        |
| MSAVI      | 0.139  |        |        |        |        |
| mSR2       | 0.138  |        |        |        |        |
| MTCI       |        | -0.174 | 0.154  |        |        |
| MTVI       | 0.128  |        |        |        |        |
| NDVI       | 0.142  |        |        |        |        |
| NDVI2      | 0.137  |        |        |        |        |

|               |        |        |        |        |        |
|---------------|--------|--------|--------|--------|--------|
| NDVI3         | -0.129 |        |        |        |        |
| OSAVI         | 0.14   |        |        |        |        |
| OSAVI2        | 0.137  |        |        |        |        |
| PARS          | 0.133  |        | 0.126  |        |        |
| PRI           | 0.125  |        | -0.111 |        |        |
| PRI_norm      | -0.116 |        | 0.203  |        |        |
| PRI*CI2       | 0.115  | 0.106  |        |        | 0.106  |
| PSRI          | -0.128 |        | 0.175  |        |        |
| PSSR          | 0.139  |        |        |        |        |
| PSND          | 0.125  |        | -0.121 | 0.134  | -0.148 |
| RDVI          | 0.137  |        |        |        |        |
| REP_Li        |        | -0.164 | 0.17   |        |        |
| SAVI          | 0.14   |        |        |        |        |
| SPVI          | 0.128  |        | 0.103  |        |        |
| SR            | 0.14   |        |        |        |        |
| SR1           | 0.14   |        |        |        |        |
| SR2           | 0.142  |        |        |        |        |
| SR3           | 0.131  |        |        |        |        |
| SR4           | 0.122  |        | -0.136 |        |        |
| SR5           | -0.127 |        | 0.112  |        |        |
| SR6           | 0.134  |        |        |        |        |
| SR8           | -0.103 | -0.105 | 0.107  | -0.179 | 0.22   |
| Sum_Dr1       | 0.123  |        | 0.102  |        |        |
| Sum_Dr2       | 0.128  |        |        |        |        |
| TCARI         |        | 0.208  |        |        |        |
| TCARI/OSAVI   |        | 0.222  |        |        |        |
| TCARI2        | 0.13   |        | 0.147  |        |        |
| TCARI2/OSAVI2 |        | 0.165  | 0.243  |        |        |
| TGI           |        | 0.185  |        |        | -0.151 |
| TVI           | 0.127  | 0.101  |        |        |        |
| Vogelmann     | 0.123  |        | 0.109  |        |        |
| Vogelmann2    | -0.102 | 0.145  | -0.105 |        | 0.143  |
| Vogelmann3    |        | -0.108 |        | -0.314 |        |
| Vogelmann4    | -0.103 | 0.143  | -0.103 |        | 0.137  |
