# Supplementary material
Source: MDPI journal article supplement (https://www.mdpi.com/2072-4292/14/10/2442)
Supplement: s1 [file s1]

**Supplementary Table S4.** Factor loads on 4 significant components for *Ambrosia artemisiifolia*, *Atriplex tatarica*, *Glycyrrhiza glabra*, *Euphorbia seguieriana*, *Setaria pumila*.

| Wavelength, nm | Comp.1 | Comp.2 | Comp.3 | Comp.4 |
|----------------|--------|--------|--------|--------|
| 470            | 0.118  |        | 0.167  | 0.233  |
| 474            | 0.118  |        | 0.162  | 0.227  |
| 478            | 0.119  |        | 0.148  | 0.223  |
| 482            | 0.119  |        | 0.136  | 0.217  |
| 486            | 0.119  |        | 0.129  | 0.205  |
| 490            | 0.119  |        | 0.122  | 0.199  |
| 494            | 0.119  |        | 0.116  | 0.189  |
| 498            | 0.12   |        | 0.114  | 0.174  |
| 502            | 0.12   |        | 0.113  | 0.153  |
| 506            | 0.122  |        | 0.114  | 0.128  |
| 510            | 0.124  |        | 0.118  |        |
| 514            | 0.126  |        | 0.131  |        |
| 518            | 0.127  |        | 0.144  |        |
| 522            | 0.128  |        | 0.151  |        |
| 526            | 0.128  |        | 0.155  |        |
| 530            | 0.128  |        | 0.153  |        |
| 534            | 0.127  |        | 0.15   | -0.102 |
| 538            | 0.127  |        | 0.144  | -0.11  |
| 542            | 0.127  |        | 0.138  | -0.117 |
| 546            | 0.127  |        | 0.132  | -0.118 |
| 550            | 0.128  |        | 0.121  | -0.117 |
| 554            | 0.129  |        | 0.109  | -0.111 |
| 558            | 0.129  |        |        | -0.105 |
| 562            | 0.13   |        |        |        |
| 566            | 0.129  |        |        |        |
| 570            | 0.128  |        |        |        |
| 574            | 0.127  |        |        |        |
| 578            | 0.126  |        |        |        |
| 582            | 0.124  |        |        |        |
| 586            | 0.123  |        |        |        |
| 590            | 0.122  |        |        |        |
| 594            | 0.121  |        |        |        |
| 598            | 0.119  |        |        |        |
| 602            | 0.118  |        |        |        |
| 606            | 0.116  |        |        |        |
| 610            | 0.114  |        |        |        |
| 614            | 0.112  |        |        |        |
| 618            | 0.11   |        |        |        |
| 622            | 0.109  |        |        |        |
| 626            | 0.108  |        | -0.103 |        |
| 630            | 0.107  |        | -0.112 |        |
| 634            | 0.106  |        | -0.123 |        |
| 638            | 0.105  |        | -0.131 |        |
| 642            | 0.103  |        | -0.137 |        |
| 646            | 0.102  |        | -0.144 |        |
| 650            | 0.101  |        | -0.151 |        |

|     |       |        |        |        |
|-----|-------|--------|--------|--------|
| 654 |       |        | -0.159 |        |
| 658 |       |        | -0.165 |        |
| 662 |       |        | -0.172 |        |
| 666 |       |        | -0.178 |        |
| 670 |       |        | -0.179 |        |
| 674 |       |        | -0.172 |        |
| 678 |       |        | -0.159 |        |
| 682 | 0.102 |        | -0.141 |        |
| 686 | 0.107 |        | -0.119 |        |
| 690 | 0.113 |        | -0.1   | -0.138 |
| 694 | 0.119 |        |        | -0.179 |
| 698 | 0.124 |        |        | -0.212 |
| 702 | 0.126 |        |        | -0.232 |
| 706 | 0.123 |        |        | -0.237 |
| 710 | 0.116 |        |        | -0.225 |
| 714 | 0.106 |        |        | -0.202 |
| 718 |       | -0.103 |        | -0.171 |
| 722 |       | -0.116 |        | -0.135 |
| 726 |       | -0.125 |        |        |
| 730 |       | -0.132 |        |        |
| 734 |       | -0.137 |        |        |
| 738 |       | -0.14  |        |        |
| 742 |       | -0.142 |        |        |
| 746 |       | -0.143 |        |        |
| 750 |       | -0.143 |        |        |
| 754 |       | -0.143 |        |        |
| 758 |       | -0.143 |        |        |
| 762 |       | -0.142 |        |        |
| 766 |       | -0.142 |        |        |
| 770 |       | -0.143 |        |        |
| 774 |       | -0.143 |        |        |
| 778 |       | -0.144 |        |        |
| 782 |       | -0.144 |        |        |
| 786 |       | -0.144 |        |        |
| 790 |       | -0.144 |        |        |
| 794 |       | -0.144 |        |        |
| 798 |       | -0.143 |        |        |
| 802 |       | -0.143 |        |        |
| 806 |       | -0.143 |        |        |
| 810 |       | -0.142 |        |        |
| 814 |       | -0.142 |        |        |
| 818 |       | -0.142 |        |        |
| 822 |       | -0.141 |        |        |
| 826 |       | -0.141 |        |        |
| 830 |       | -0.141 |        |        |
| 834 |       | -0.141 |        |        |
| 838 |       | -0.141 |        |        |
| 842 |       | -0.141 |        |        |
| 846 |       | -0.141 |        |        |
| 850 |       | -0.141 | -0.106 |        |

|     |  |        |        |
|-----|--|--------|--------|
| 854 |  | -0.14  | -0.114 |
| 858 |  | -0.14  | -0.123 |
| 862 |  | -0.14  | -0.131 |
| 866 |  | -0.139 | -0.139 |
